# Supplementary material
Source: publisher site journal article supplement (https://www.spandidos-publications.com/5187/downloadSupplementary)

Figure S1. The representative MTT assay results for evaluation of drug sensitivity. A549 cells cultured in 2D and 3D systems were treated with the indicated concentration of a variety of conventional chemotherapeutic drugs, small molecule inhibitors, and natural products for 48 h. The MTT assay was used to assess the drug's effect on cell viability.

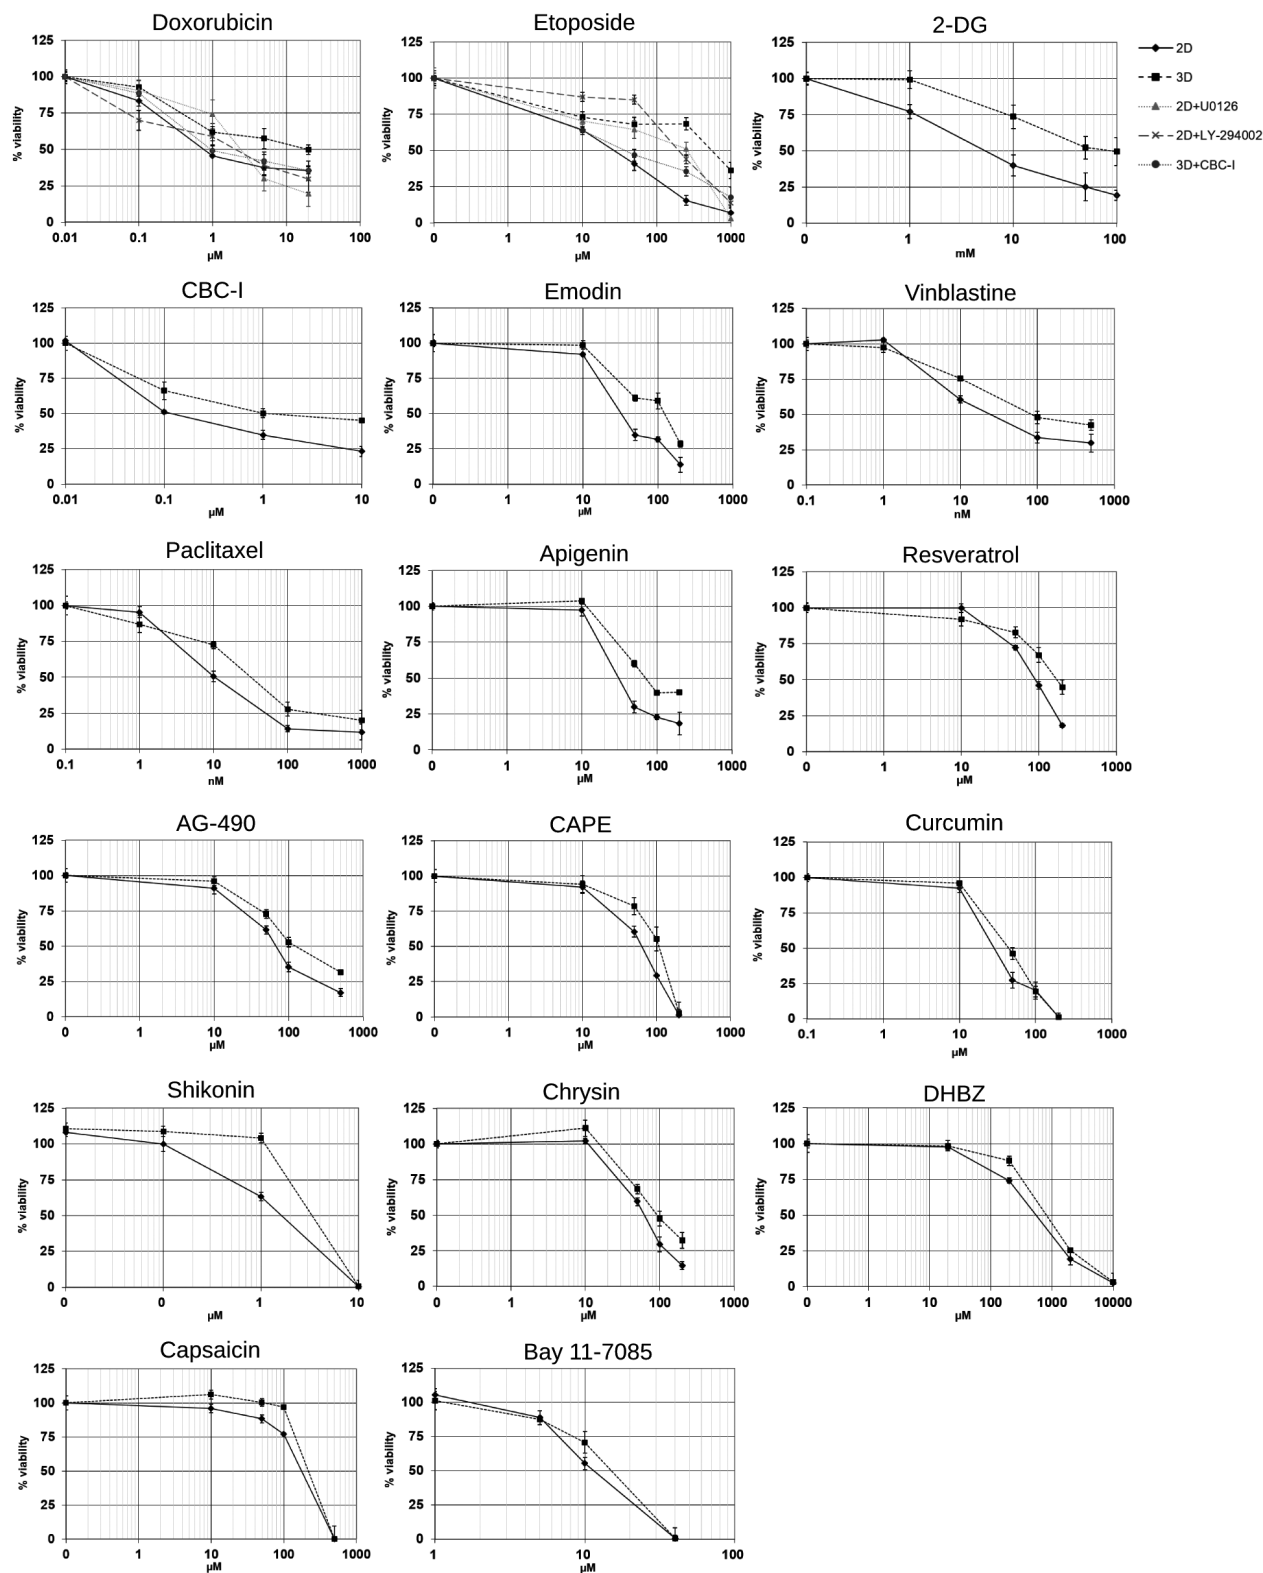

Supplement: Supplementary file 1 [file downloadSupplementary]
